# Supplementary material
Source: PubMed Central journal article supplement (PMC4926963)
Supplement: ASN.2014121200_ASN2014121200SupplementaryData.pdf [file ASN.2014121200_ASN2014121200SupplementaryData.pdf]

# Supplementary Figures

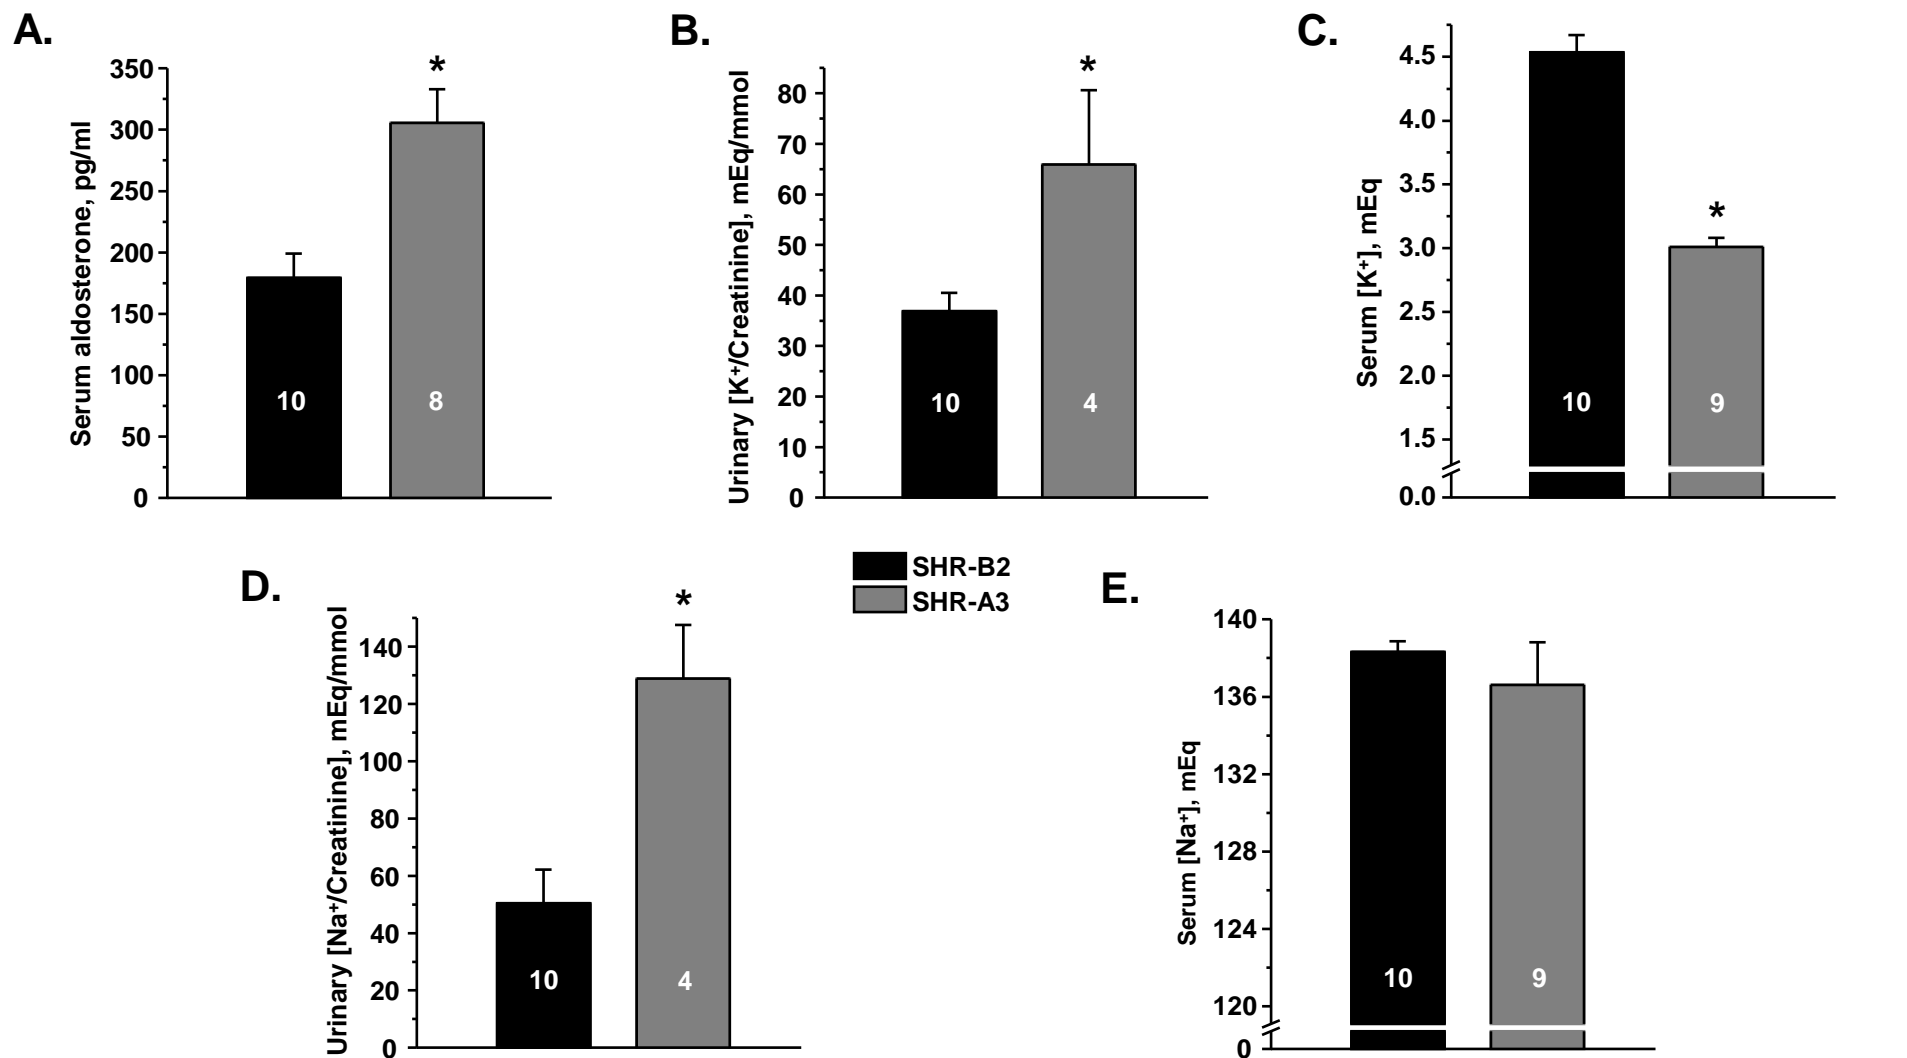

**Figure S1.** Aldosterone, potassium and sodium in bodily fluids. **(A)** Summary graph comparing serum aldosterone levels in SHR-B2 (black) and SHR-A3 (grey). **(B)** Summary graph comparing potassium to creatinine ratio in spot urine samples from SHR-B2 and SHR-A3. **(C)** Summary graph demonstrating averaged serum potassium levels in SHR-B2 and SHR-A3. **(D)** Summary graph showing sodium to creatinine ratio in spot urine samples from SHR-B2 and SHR-A3. **(E)** Summary graph comparing average serum sodium concentrations in SHR-A3 and SHR-B2. \* –  $P < 0.05$  versus SHR-B2, estimated with one-way ANOVA test. The number of animals in each group is indicated on top of the respective bars.

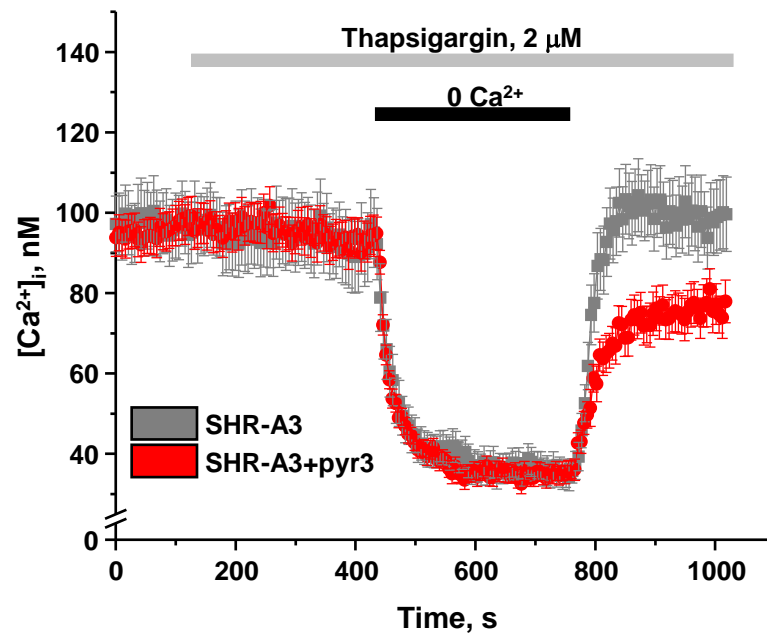

**Figure S2.** The average time courses of  $[Ca^{2+}]_i$  changes in response to  $Ca^{2+}$  removal –  $Ca^{2+}$  re-addition protocol upon depletion of  $[Ca^{2+}]_i$  stores with thapsigargin recorded in CD cells from SHR-A3 in the control (grey) and on the background of nonspecific TRPC3/ORAI1 inhibitor – pyr3 ( $5 \mu M$ , shown in red).

**A.**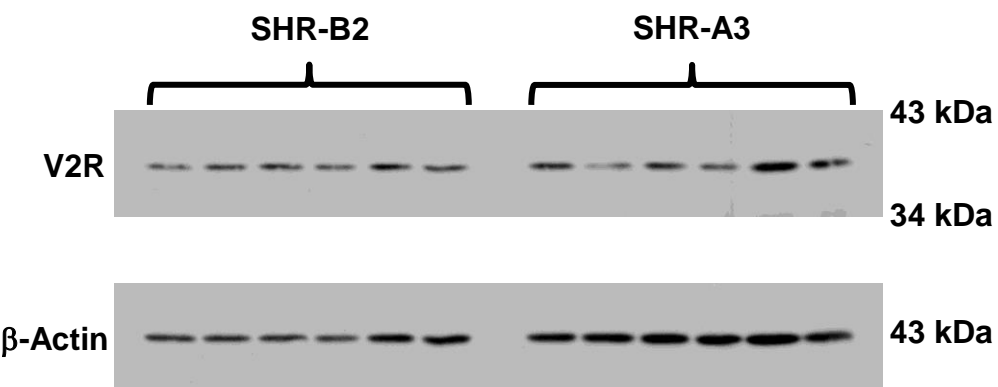**B.**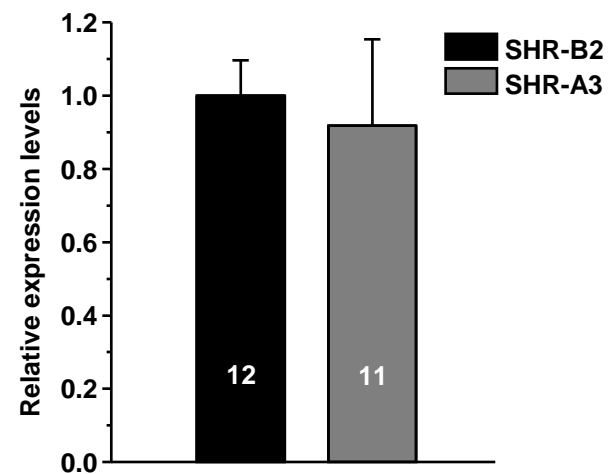

**Figure S3.** (A) Representative western blot from whole kidney lysates of SHR-B2 and SHR-A3 probed with anti-V2R and anti- $\beta$ -actin antibodies. (B) Summary graph comparing total renal V2R expression in SHR-B2 (black) and SHR-A3 (grey) from western blots similar to that shown in (A). The number of animals in each group is indicated on top of the respective bars.

**A.**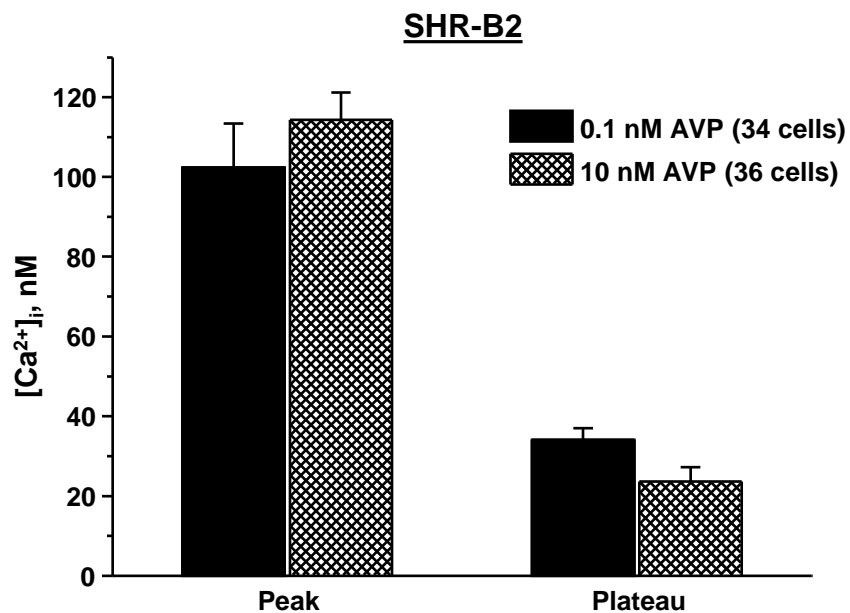**B.**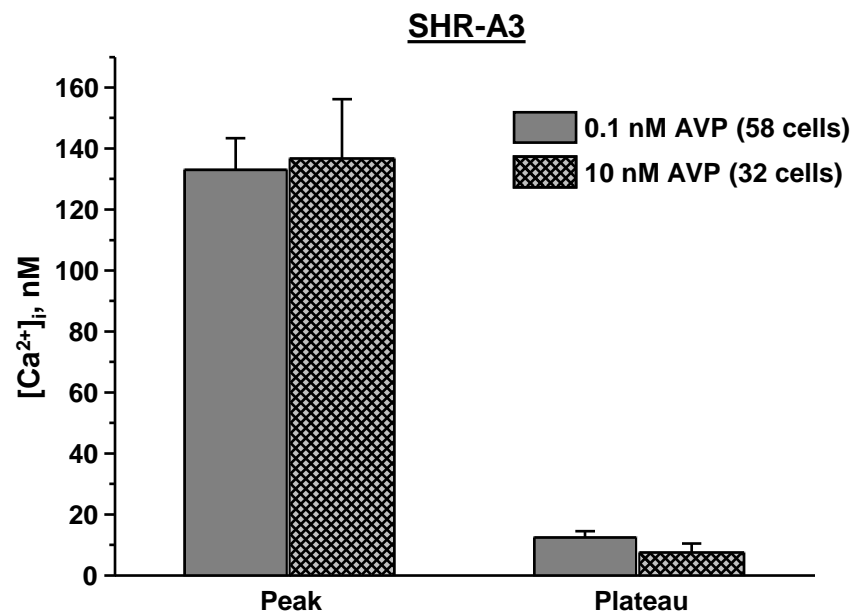

**Figure S4.** Summary graphs comparing the average magnitudes of transient peak (left panels) and sustained plateau (right panels) phases of  $[Ca^{2+}]_i$  responses recorded in CD cells from SHR-B2 (**A**) and SHR-A3 (**B**) upon treatment 0.1 nM and 10 nM of AVP. The number of cells in each treatment group is indicated near respective figure legend bars.

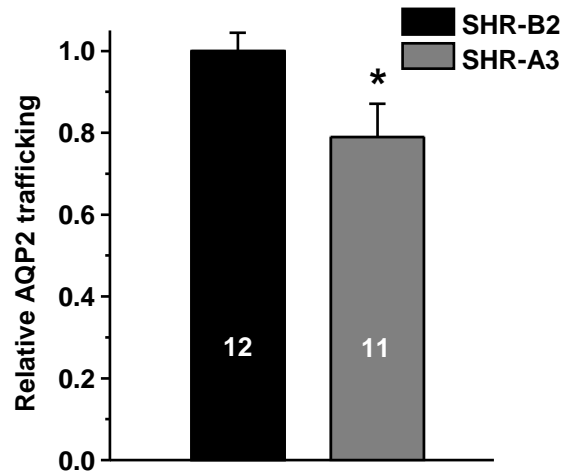

**Figure S5.** Summary graph comparing estimated relative rates of AQP2 trafficking in SHR-B2 (black) and SHR-A3 (gray). \* –  $P < 0.05$  versus SHR-B2, estimated with one-way ANOVA test. The number of animals in each group is indicated on top of the respective bars.
